# Supplementary material for: Limits to Causal Inference with State-Space Reconstruction for Infectious Disease
Source: PubMed Central journal article supplement (PMC5193453; doi:10.1371/journal.pone.0169050), 2016-12-28
Supplement: pone.0169050.s005.pdf [file pone.0169050.s005.pdf]

$C_2$  causes  $C_1$ 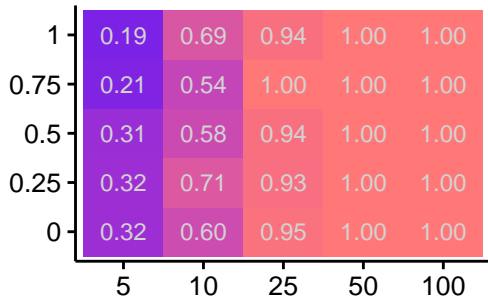 $C_1$  causes  $C_2$ 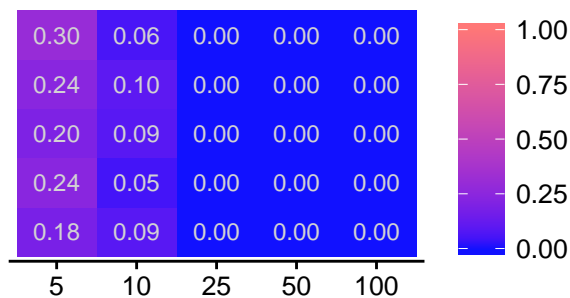

time series length (years)
