# Supplementary material for: Limits to Causal Inference with State-Space Reconstruction for Infectious Disease
Source: PubMed Central journal article supplement (PMC5193453; doi:10.1371/journal.pone.0169050), 2016-12-28

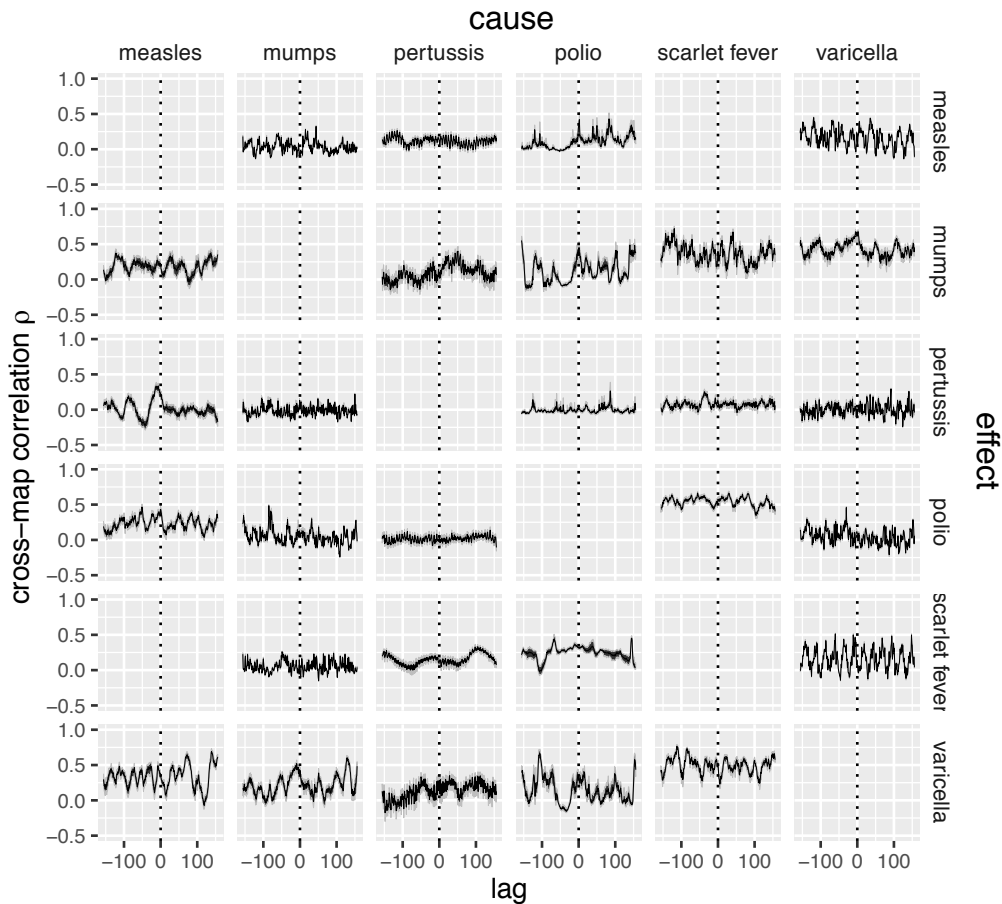

Supplement: pone.0169050.s010.pdf [file pone.0169050.s010.pdf]
